1 **Transmission Clusters of Hepatitis C Virus among Public Health and**  
2 **Correctional Settings in Wisconsin, 2016-2017**

3

4 Karli R. Hochstatter<sup>1</sup>, Damien C. Tully<sup>1</sup>, Karen A. Power, Ruth Koepke, Wajiha Z. Akhtar,  
5 Audrey F. Prieve, Thomas Whyte, David J. Bean, David W. Seal, Todd M. Allen<sup>2</sup>, Ryan P.  
6 Westergaard<sup>2</sup>

7

8 Author Affiliations: University of Wisconsin School of Medicine and Public Health, Madison,  
9 WI, USA (K.R. Hochstatter, W.Z. Akhtar, R.P. Westergaard); Columbia University, New York,  
10 NY, USA (K.R. Hochstatter); Ragon Institute of MGH, MIT and Harvard, Cambridge, MA,  
11 USA (D.C. Tully, K.A. Power, D.J. Bean, T.M. Allen); London School of Hygiene and Tropical  
12 Medicine, London, UK (D.C. Tully); Wisconsin Department of Health Services, Madison (R.  
13 Koepke, R.P. Westergaard); Wisconsin State Laboratory of Hygiene, Madison (A.F. Prieve, T.  
14 Whyte); Tulane University School of Public Health and Tropical Medicine, New Orleans, LA,  
15 USA (D.W. Seal)

16

17 <sup>1</sup>These first authors contributed equally to this article.

18 <sup>2</sup>These senior authors contributed equally to this article.

19

20

21 **Abstract word count: 150**

22 **Text word count: 3,549**

23

24 **Article Summary Line:** Integrating existing public health surveillance and molecular analyses  
25 with Global Hepatitis Outbreak Surveillance Technology allows for the identification and  
26 characterization of growing HCV transmission clusters among key populations in Wisconsin.

27

28 **Running head:** Hepatitis C Transmission Clusters in Wisconsin

29

30 **Keywords:** Hepatitis C virus, injection drug use, global hepatitis outbreak surveillance  
31 technology, molecular epidemiology, phylogenetics

32

33

34 **ABSTRACT**

35 Ending the hepatitis C virus (HCV) epidemic requires stopping transmission among  
36 networks of people who inject drugs (PWID). Identification of transmission networks through  
37 the application of genomic epidemiology may inform community response models that can  
38 quickly interrupt transmission. We retrospectively identified HCV RNA-positive specimens  
39 corresponding to 459 individuals tested in public health settings, including correctional facilities  
40 and syringe service programs, in Wisconsin from 2016-2017. Next-generation sequencing of  
41 HCV was conducted and analyzed for phylogenetic linkage using the CDC's Global Hepatitis  
42 Outbreak Surveillance Technology platform. Transmission network analysis showed that 126  
43 individuals were linked across 42 clusters (range: 2-11 individuals per cluster). Phylogenetic  
44 clustering was higher in rural communities and associated with female gender and younger age  
45 among rural residents. These data highlight that the increasing rurality of opioid injection use  
46 and HCV transmission among young PWID could be better supported by the expansion of  
47 molecular-based surveillance strategies to reduce transmission.

48

49 **Keywords:**

50 Hepatitis C virus, injection drug use, global hepatitis outbreak surveillance technology,  
51 molecular epidemiology

52

53

54

55

56

57

58

## 59 INTRODUCTION

60 Sharp increases in hepatitis C virus (HCV) infection have been observed in the United  
61 States, where an estimated 2.4 million persons are living with chronic infection (1). In 2013,  
62 approximately 19,368 persons died from HCV-related complications, exceeding the number of  
63 deaths from all other nationally notifiable infectious diseases combined (2). A 2-fold increase in  
64 the prevalence of HCV has occurred between 2004 and 2014, a direct result of the opioid  
65 epidemic and associated increases in the sharing of contaminated injection drug use equipment  
66 (3). As the intersecting epidemics of opioid injection and infectious diseases are complex and  
67 dynamic, implementing community-specific comprehensive prevention services has remained  
68 challenging. Reliable strategies to identify individuals and communities most vulnerable are  
69 essential for the development of community response models able to deliver evidence-based  
70 prevention services in time to prevent worsening of these synergizing epidemics.

71 Epidemiologists and public health experts are increasingly utilizing molecular-based  
72 surveillance techniques to identify and control emerging outbreaks (4–7). For example, the US  
73 Centers for Disease Control and Prevention (CDC) has recently scaled up the use of molecular  
74 HIV surveillance with pilot projects in 27 states towards an “Ending the HIV epidemic” initiative  
75 (8). Expanded use of molecular surveillance has the potential to significantly inform HCV  
76 treatment and prevention efforts. However, application of such programs for HCV surveillance  
77 has lagged despite the potential importance of such approaches in disrupting HCV transmission.  
78 Global Hepatitis Outbreak and Surveillance Technology (GHOST) is a public health tool

79 developed by CDC that uses next generation sequencing methods for molecular HCV  
80 surveillance and outbreak investigation (9). Analysis of next-generation sequencing data for  
81 viruses is complex and particularly challenging and requires significant expertise in  
82 bioinformatics and phylogenetics. GHOST integrates a suite of computational tools to accurately  
83 detect possible HCV transmission clusters from next generation sequencing data in a simple  
84 fashion regardless of the user's level of expertise. The cloud-based system provides the user with  
85 detailed reports on the likelihood of linked transmission events within a cohort of HCV-infected  
86 individuals, thus providing an opportunity for the rapid identification of existing or growing  
87 HCV transmission clusters and an improved response by state and local public health  
88 departments.

89 Wisconsin is a state in the U.S. with a population of 5.8 million residents. Between 2016  
90 and 2017, the rate of opioid overdose in Wisconsin increased 109%, representing the steepest  
91 increase observed in any U.S. state, and nearly 3 times the average national increase over that  
92 time period (10). Similar to what has been observed nationally, this sharp increase in opioid use  
93 is accompanied by substantial increases in the incidence of HCV. Between 2011 and 2015,  
94 approximately 3,000 new HCV diagnoses were reported annually. The rate of new PCR-  
95 confirmed HCV diagnoses among people aged 15-29 more than doubled during that time period,  
96 from 40 to 87 cases per 100,000 population, as a result of recent injection drug use (11).

97 In this study, we integrate existing public health surveillance and molecular analyses with  
98 GHOST to identify putative HCV transmission clusters among persons likely infected through  
99 injection drug use during a period of expanded HCV transmission (12) and investigate the  
100 network characteristics among this high-risk group.

101

## 102 **MATERIALS AND METHODS**

### 103 *Study Setting*

104 All HCV-positive reports in Wisconsin are routinely reported to the Wisconsin Electronic  
105 Disease Surveillance System (WEDSS), a secure, web-based health information system used for  
106 the reporting, investigation, and surveillance of communicable diseases in Wisconsin. Blood  
107 samples collected for HCV RNA confirmatory testing at sites supported by the Wisconsin  
108 Division of Public Health (DPH) are processed at the Wisconsin State Laboratory of Hygiene  
109 and stored for up to 5 years. Approximately 15% of all HCV cases reported to WEDSS represent  
110 individuals who underwent fee-exempt HCV RNA confirmatory testing through the State  
111 Laboratory; these instances typically reflect testing done in public health settings such as syringe  
112 service programs and correctional facilities, and not traditional health care settings. This results  
113 in a cohort that is enriched for younger people with a history of injection drug use.

### 114 *Study Population*

115 Individuals confirmed to have an HCV RNA-positive sample analyzed at the State  
116 Laboratory and reported to WEDSS for the first time during 2016-17 were identified using two  
117 methods. First, we identified 241 individuals residing in rural catchment areas. Counties included  
118 in the rural catchment area were selected based on participation in an ongoing federally funded  
119 research program, and were classified as rural because they were served by one of the statewide  
120 syringe service program's six rural offices. Secondly, we identified an additional cohort of 218  
121 individuals outside of the targeted rural area who were considered likely to represent recent or

122 acute infections because they had either (1) presented as acute HCV when reported to WEDSS or  
123 (2) were age 15-39 at diagnosis and had a HCV viral load >1,000,000 IU/L. This second cohort,  
124 which included counties served by one of the syringe service program's four urban offices as  
125 well as correctional populations, was included to improve network completeness and compare  
126 the extent of clustering between rural and non-rural populations.

### 127 *Specimen Processing*

128 Per standard protocol, serum remaining after HCV antibody and RNA PCR testing is  
129 completed is stored at the State Laboratory at -80°C. Specimens corresponding to the HCV  
130 RNA-positive individuals identified in WEDSS were retrieved from the freezer and overnight  
131 shipped on dry ice to the Ragon Institute of MGH, MIT and Harvard for viral sequencing.

### 132 *Nucleic acid extraction and PCR amplification*

133 RNA was isolated from 140 µl of plasma using the QIAamp Viral RNA Mini Kit  
134 (Qiagen, Hilden, Germany). A one step RT-PCR reaction was performed on all samples to  
135 amplify a segment at the E1/E2 junction of the HCV genome which contains the hypervariable  
136 region 1 (HVR1) (13). This region was chosen for its high variability and its ability to reliably  
137 detect transmission events in outbreak settings (14). The first round RT-PCR consisted of an  
138 Illumina adapter specific portion, a sample specific barcode segment, and an HCV HVR specific  
139 primer segment, F1- GTGACTGGAGTTCAGACGTGTGCTCTTCCGATCT-  
140 NNNNNNNNNN-GGA-TAT-GAT-GAT-GAA-CTG-GT and R1-ACA-CTC-TTT-CCC-TAC-  
141 ACG-ACG-CTC-TTC-CGA-TCT-NNNNNNNNNN-ATG-TGC-CAG-CTG-CCG-TTG-GTG-  
142 T at a final concentration of 4 pM amplified using Superscript III RT/Platinum Taq DNA

143 Polymerase High Fidelity with the following conditions: cDNA synthesis for 30 minutes at  
144 55°C, followed by heat denaturation at 95°C for 2 minutes, the PCR amplification conditions  
145 were 40 cycles of denaturation (94°C for 10 seconds), annealing (55°C for 10 seconds) and  
146 extension (68°C for 10 seconds) with a final extension at 68°C for 5 minutes. Amplified products  
147 were run on a 1% agarose gel and either PCR purified with the Qiaquick PCR purification kit  
148 (Qiagen) or gel extracted and purified using the PureLink quick gel extraction kit (Invitrogen). A  
149 second round limited cycle PCR (94°C for 2 minutes, (94°C for 15 sec; 55°C for 30 sec; 68°C for  
150 30 sec) x 8 cycles, 68°C for 5 minutes) is performed to add barcode specific indexes and  
151 sequencing specific adapters and primers to each sample to allow for multiplexing as well as  
152 internal controls for cross-contamination. Negative controls were introduced at each stage of the  
153 procedure and all PCR procedures were performed under PCR clean room conditions using  
154 established protocols. Indexed samples are 0.7X SPRI purified two times to remove excess  
155 primer dimer and short fragments that can interfere with the sequencing process.

#### 156 *Illumina deep sequencing and analysis*

157 Resulting PCR amplicons were quantified using the Picogreen kit (Invitrogen, Carlsbad,  
158 CA) on a Fluorometer ST (Promega, Madison, WI) with the integrity of the fragment evaluated  
159 using a Bioanalyzer 2100 (Agilent, Santa Clara, CA). Samples were pooled and sequenced on an  
160 Illumina MiSeq platform using a 2 x 250 bp V2 Nano reagent kit. In general, a sequence library  
161 consisted of between 8-16 specimens including one negative control for every 7 serum  
162 specimens. Paired end reads were subject to stringent cleaning and quality control criteria as  
163 outlined previously (15–17). Duplicate reads were removed using fastuniq v1.1 (18) and quality



164 trimmed using trimmomatic v0.36 (19). Viral contigs were generated using Vicuna v1.1 (20) and  
165 a *de novo* consensus assembly generated using V-FAT v1.1.

### 166 *Phylogenetic reconstruction*

167 Consensus sequences were aligned using MEGA v6.0 (21) and IQ-TREE v1.6 (22) was  
168 used to construct a maximum likelihood phylogenetic tree with 1,000 ultrafast bootstrap  
169 replicates (23).

### 170 *HCV transmission network analysis*

171 Illumina paired end reads were uploaded to GHOST where they were subjected to  
172 automatic quality control that rejects data depending on the magnitude of the quality problem  
173 and warns and guides users in resolving the issue. Further methodological details on the quality  
174 filtering can be found elsewhere (9,24). Transmission links that represent the genetic similarity  
175 among viral populations from infected individuals were examined by the transmission analysis  
176 module of GHOST. In each case the intra-host populations were compared between infected  
177 individuals and the genetic distance, defined as the Hamming distance, between their closest  
178 haplotypes was calculated. If the genetic distance was smaller than an empirically defined  
179 genetic distance threshold of 3.77% then individuals are considered to be genetically related and  
180 form a transmission cluster (14). To further analyze the genetic relationships in each cluster and  
181 to visualize the nature of intra-host variation, k-step networks of intra-host HCV HVR1 variants  
182 were built as previously described (9).

### 183 *Data Collection*

184 Variables routinely reported to WEDSS for individuals who test HCV-positive include  
185 age, gender, race/ethnicity, HCV-positive antibody and RNA test date(s), and testing site(s).  
186 Additionally, individuals tested by a community-based multisite syringe service program,  
187 operated by 10 offices across the state and a mobile van, provide risk information through the  
188 syringe service program's standard HCV testing procedures. Reporting of risk information is not  
189 mandatory. When possible, local health department staff gather risk information from the health  
190 care provider or directly from the patient and enter the risk information into WEDSS. HCV cases  
191 originally reported from state correctional facilities are not interviewed by local public health  
192 and typically do not have risk information available. For individuals with risk information  
193 available, we assessed whether they ever engaged in injection drug use, shared drug injection  
194 equipment, are a male who has sex with other males (MSM) or were ever incarcerated. Persons  
195 were considered to be incarcerated if they had any HCV test result reported to WEDSS that was  
196 conducted at a state correctional facility or if the person reported ever being incarcerated on risk  
197 information forms. Because availability of risk information depends on the type of facility where  
198 the individual was tested, we present demographic characteristics and risk behaviors by type of  
199 testing facility: community-based organization, corrections, local health department, or other  
200 public venues.

201 Data were collected under a waiver of informed consent. This study was approved by the  
202 University of Wisconsin's Health Sciences Institutional Review Board and the Massachusetts  
203 General Hospital Institutional Review Board. Data Use Agreements and a Materials Transfer  
204 Agreement were established between the University of Wisconsin, DPH, the State Laboratory,  
205 and the Ragon Institute of MGH, MIT and Harvard.

206 *Statistical Analyses*

207 Chi-square, Fisher's exact, t-test, and analysis of variance (ANOVA) were conducted  
208 using StataSE version 16 (Statacorp, College Station, TX) to compare clustering by  
209 demographics and risk behaviors. Because sampling techniques differed in rural and non-rural  
210 catchment areas and the characteristics assessed were strongly determined by which catchment  
211 area they were in, we compared individuals who clustered to those who did not cluster stratified  
212 by catchment area. We also compared characteristics between rural catchment area-only clusters,  
213 non-rural catchment area-only clusters, and clusters that contained individuals from both groups.  
214 Statistical significance was determined using  $\alpha=.05$ .

215

216 **RESULTS**

217 *Study Sample*

218 Between 2016 and 2017, 459 individuals tested HCV RNA-positive in public health  
219 settings in Wisconsin for the first time. Of these, 424 (92.4%) had sufficient (approximately  
220 200ul or more) residual serum specimens stored in the State Laboratory freezer. All 424  
221 specimens were shipped for viral sequencing. Of these, 379 of 424 specimens (89.4%) were  
222 successfully amplified, sequenced, and passed GHOST quality control metrics. Among the  
223 specimens that failed, 23 (5.4%) failed PCR and 22 (5.2%) failed GHOST quality control  
224 metrics. After quality control the median number of error-corrected reads per individual was  
225 16,740 (IQR: 13,302 – 18,262) while the median number of haplotypes was 3,322 (IQR: 2,479 –  
226 4,345).

227 *Patient Demographic Characteristics and Risk Behaviors*

228           Among the 379 individuals whose specimens were successfully analyzed by GHOST,  
229 125 (33.0%) first tested positive at a community-based organization, 154 (40.6%) in a  
230 correctional facility, 40 (10.6%) at a local health department, and 60 (15.8%) in a different  
231 public health setting (**Table 1**). The study population was primarily non-Hispanic white (85.0%),  
232 aged 18-39 years (90.8%), and male (75.5%). Self-report of injection drug use was documented  
233 among 177 (46.7%) individuals, and of these, 145 (81.9%) self-reported ever sharing injection  
234 equipment. MSM was reported for 8 (2.1%) individuals. The majority of the study population  
235 has experienced incarceration (88.1%).

236           Among the 379 individuals, 171 (45.1%) resided in the rural catchment area, of which 67  
237 (39.2%) clustered, and 208 (54.9%) resided outside of the rural catchment area or in correctional  
238 facilities, of which 59 (28.4%) clustered. Among the 171 individuals in the rural catchment area,  
239 females were significantly more likely to cluster than males (49% vs 33%) ( $P=0.04$ ), and  
240 individuals who clustered were significantly younger (mean age: 28.7) than individuals who did  
241 not cluster (mean age: 34.1) ( $P=0.0001$ ). There were no statistically significant differences  
242 between those who clustered and those who did not cluster in non-rural catchment areas.

243 *Phylogenetic analysis*

244           HCV strains were genetically characterized using HVR1 consensus sequences derived  
245 from all 379 individuals. Phylogenetic analysis demonstrated a predominance of genotype 1a  
246 (n=255, 67.3%) and 3a (n=88, 23.2%) infections, followed by 2b (n=22, 5.8%), 1b (n=9, 2.4%),  
247 2a (n=4, 1.1%) and 4a (n=1, 0.3%) (**Figure 1**). Within each of the major subtypes, sequences

248 were composed of multiple lineages with the largest HVR1 cluster involving over half (54%) of  
249 all subtype 1a sequences generated. These observations suggest multiple independent HCV  
250 introductions into this population in the past.

### 251 *HCV Transmission Linkages*

252 GHOST detected 42 clusters comprising 126 individuals for an overall clustering rate of  
253 33% (**Figure 2**). The size of clusters ranged from 2 to 11 individuals. The transmission networks  
254 were composed of mostly dyads (n=23, 54.8%), followed by groups of 3 (n=9, 21.4%), 4 (n=3,  
255 9%) and 5 (n=6, 14.3%). The largest cluster involved 11 individuals, all infected with genotype  
256 3a, with two individuals first reported to WEDSS in 2016 and nine from 2017. Five of the 11  
257 first tested HCV-positive by the same local health department, and three first tested HCV-  
258 positive at the same syringe service clinic. Evidence of past injection drug use was available for  
259 7 individuals, 8 were male, and all 11 were non-Hispanic white with a history of incarceration.  
260 Among the 42 clusters identified, 12 were comprised only of individuals not residing in the rural  
261 catchment area (n=27), 12 were comprised only of individuals residing in the rural catchment  
262 area (n=34), and 18 contained individuals from both groups (n=65). Rural catchment area-only  
263 clusters were more likely to have a higher percentage of females. No other significant differences  
264 between rural, non-rural, and mixed clusters were found.

### 265 *Intra-host genetic variation within transmission clusters*

266 GHOST analysis of the intra-host HVR1 variants in 379 individuals revealed five  
267 individuals (1.3%) were infected with multiple HCV strains (**Table 2**). In all cases, genotype 1a  
268 was the major strain, with two individuals harboring minor variants of genotype 3a and

269 genotypes 2a, 2b and 6f also found. To further understand the nature of HCV transmission across  
270 clusters, we examined the population structure of HVR1 variants to address whether the same  
271 viral variant was shared among HCV infected individuals as previously described (14). While it  
272 is not possible to illustrate the k-step networks for each sample, we highlight here representative  
273 examples of clusters. One cluster comprises three individuals (subjects 372, 338 and 362) with  
274 both subjects 338 and 362 harboring little intra-host genetic variation and sharing 19 viral  
275 variants (modified Hamming distance = 0) (**Figure 3a**). The third individual, subject 372, is  
276 infected with many diverse variants with a single subpopulation that is genetically similar to  
277 those variants found in subjects 338 (**Figure 3b**) and 362 (**Figure 3c**). Another representative  
278 cluster comprises a simple dyad of subjects 84 and 86 which share a variant (modified Hamming  
279 distance = 0.37) that only has a minor difference between each other (**Figure 4a**). In contrast, the  
280 cluster of subject 281 and 367 shares a more distantly related variant (modified Hamming  
281 distance = 3.18) (**Figure 4b**). Taken together, this reveals a complex picture of variable and  
282 extensive interconnectedness between variants with only a minority of individuals (n=14)  
283 sharing the same viral variant within a transmission cluster.

284

## 285 **DISCUSSION**

286 This study is the first to link state-wide public health surveillance to HCV transmission  
287 clusters identified by GHOST. Among 459 individuals who tested HCV-positive in public health  
288 settings in Wisconsin from 2016 to 2017, 424 had sufficient plasma remaining after standard  
289 antibody and RNA testing procedures with 379 (89.4%) successfully analyzed by GHOST. Of  
290 these, 126 (33%) were detected among 42 HCV transmission clusters. The majority of clusters

291 were formed of dyads, with larger clusters linking multiple sequences less abundant in the  
292 populations tested. This rate of clustering is comparable to that found in Vancouver and  
293 Baltimore, which found 31% and 46% of PWIDs cluster, respectively (25,26). However, an  
294 important distinction between these studies and ours is the geographical region sampled.  
295 Whereas these prior studies only included PWIDs from their respective metropolitan areas, this  
296 study included both urban and rural populations. We found a higher clustering rate in the rural  
297 catchment area, and rural individuals that clustered were of younger age, a finding that aligns  
298 with the current literature describing the particular burden of HCV on young persons in rural  
299 communities (27,28). Moreover, these data highlight that the increasing rurality of opioid  
300 injection and HCV transmission among young PWIDs could be better supported by the  
301 expansion of molecular-based surveillance strategies to reduce transmission. The availability of  
302 transmission networks would allow for the underlying contact network structure to be targeted  
303 such that individuals that have a high centrality within a network have a much greater  
304 contribution to infection than peripheral nodes. This type of network-based disruption strategy  
305 has been demonstrated to produce the greatest reduction in incidence compared to randomly  
306 targeted prevention strategies (29).

307         The CDC estimates that approximately half of all HCV-infected persons are unaware of  
308 their infection status (30). Using molecular epidemiological methods to investigate the  
309 transmission of infectious diseases has many advantages over traditional contact tracing  
310 methods, in which data collection is often time-intensive and results may be subject to recall and  
311 social desirability biases. Contact tracing among people who engage in illegal activity is  
312 especially challenging as individuals are often reluctant to disclose injecting behaviors or name  
313 injecting partners because of stigma or fear of criminal repercussions (31). GHOST overcomes

314 these limitations by automatically interpreting biological data in a timely manner (within hours).  
315 Near real-time monitoring systems already exists for HIV-1 and the application of an automated  
316 phylogenetic system has been used to detect and rapidly respond to an outbreak of transmitted  
317 drug resistance in Vancouver (32). Thus, a greater investment in viral surveillance would allow  
318 for enhanced outbreak control responses and analytical frameworks such as those implemented  
319 in GHOST and could be readily applied to assist in understanding HCV transmission dynamics  
320 in the U.S. As modeling studies have demonstrated that elimination of HCV can be achieved  
321 through scaling up and targeting treatment (33,34), a concept know as ‘treatment-as-prevention’  
322 often used in HIV research (35,36), conducting routine molecular surveillance may also advance  
323 HCV prevention efforts by facilitating the ability of health departments to efficiently allocate  
324 limited resources to target and treat members in large clusters. Furthermore, it could be used to  
325 aid in discriminating recent versus long-established introduction of infections in high-risk  
326 communities.

327         This study has several limitations. First, HCV testing and surveillance challenges make it  
328 difficult to identify a complete cohort of HCV-infected PWIDs. Individuals not included in this  
329 analysis include those who have never been tested, those tested outside of Wisconsin, and people  
330 who were tested in other settings (e.g. primary care) that use commercial or hospital-based  
331 laboratories for HCV confirmatory testing. Accordingly, the population studied is not fully  
332 representative of the Wisconsin general population. However, our results do provide a credible  
333 picture of the HCV epidemic across public health settings throughout rural and urban Wisconsin.  
334 Second, the association we found between clustering and younger age among rural residents  
335 could be due to sampling a larger number of younger persons. Further research is needed  
336 examining the role that older HCV-infected individuals play in transmission networks. Third,



337 risk information data are missing for a large proportion of the sample because few agencies  
338 routinely collect and report it. Although this limited the types of analyses we could conduct, it  
339 also demonstrates where data collection from different types of public health agencies can be  
340 improved to better understand the characteristics of HCV transmission clusters on a state level.  
341 Lastly, phylogenetic clustering alone cannot directly assert whether transmission occurred  
342 directly or indirectly via unsampled individuals and can be subjected to biases (37).

343 In conclusion, we provided a snapshot of the HCV epidemic in rural and urban  
344 Wisconsin between 2016-2017. Additional research to understand the dynamics of HCV  
345 transmission is urgently needed particularly in rural communities affected by the opioid crisis.  
346 Incorporating GHOST into routine laboratory surveillance practices may enhance the ability of  
347 public health departments to detect individuals contributing most to HCV transmission in their  
348 communities and prompt more efficient interventions.

349

350

351

352

353

354

355

356

357 **TABLES**

358 **Table 1:** Demographic and risk factor information, by type of testing facility

|                                  | Type of facility where the individual first tested HCV-positive |       |                              |      |             |      |                         |      |       |      |
|----------------------------------|-----------------------------------------------------------------|-------|------------------------------|------|-------------|------|-------------------------|------|-------|------|
|                                  | Overall                                                         |       | Community-based organization |      | Corrections |      | Local health department |      | Other |      |
|                                  | N                                                               | (%)   | N                            | (%)  | N           | (%)  | N                       | (%)  | N     | (%)  |
| <b>Total</b>                     | 379                                                             | 100.0 | 125                          | 33.0 | 154         | 40.6 | 40                      | 10.6 | 60    | 15.8 |
| Year first reported to WEDSS*    |                                                                 |       |                              |      |             |      |                         |      |       |      |
| 2016                             | 222                                                             | 58.6  | 72                           | 57.6 | 87          | 56.5 | 24                      | 60.0 | 39    | 65.0 |
| 2017                             | 155                                                             | 40.9  | 53                           | 42.4 | 67          | 43.5 | 16                      | 40.0 | 21    | 35.0 |
| Age                              |                                                                 |       |                              |      |             |      |                         |      |       |      |
| 18-29                            | 190                                                             | 50.1  | 61                           | 48.8 | 77          | 50.0 | 20                      | 50.0 | 32    | 53.3 |
| 30-39                            | 154                                                             | 40.6  | 41                           | 32.8 | 75          | 48.7 | 17                      | 42.5 | 21    | 35.0 |
| >40                              | 35                                                              | 9.2   | 23                           | 18.4 | 2           | 1.3  | 3                       | 7.5  | 7     | 11.7 |
| Race/Ethnicity                   |                                                                 |       |                              |      |             |      |                         |      |       |      |
| NH* White                        | 318                                                             | 85.03 | 106                          | 84.8 | 127         | 84.7 | 36                      | 90.0 | 49    | 83.1 |
| Hispanic or Latino               | 18                                                              | 4.8   | 6                            | 4.8  | 7           | 4.6  | 2                       | 5.0  | 3     | 5.0  |
| American Indian or Alaska Native | 21                                                              | 5.5   | 7                            | 5.6  | 9           | 5.8  | 1                       | 2.5  | 4     | 6.7  |
| Asian                            | 2                                                               | 0.5   | 0                            | 0.0  | 1           | 0.7  | 0                       | 0.0  | 1     | 1.7  |
| NH* Black or African American    | 12                                                              | 3.2   | 5                            | 4.0  | 5           | 3.3  | 1                       | 2.5  | 1     | 1.7  |
| Other/ Multiple/ Unknown         | 8                                                               | 2.1   | 1                            | 0.8  | 5           | 3.2  | 0                       | 0.0  | 2     | 3.3  |
| Gender                           |                                                                 |       |                              |      |             |      |                         |      |       |      |
| Female                           | 93                                                              | 24.5  | 46                           | 36.8 | 14          | 9.1  | 14                      | 35.0 | 19    | 31.7 |

|                                |     |      |     |      |     |       |    |      |    |      |
|--------------------------------|-----|------|-----|------|-----|-------|----|------|----|------|
| Male                           | 286 | 75.5 | 79  | 63.2 | 140 | 90.9  | 26 | 65.0 | 41 | 68.3 |
| Ever inject drugs              |     |      |     |      |     |       |    |      |    |      |
| Yes                            | 177 | 467  | 100 | 80.0 | 16  | 10.4  | 34 | 85.0 | 27 | 45.0 |
| No or unknown                  | 202 | 53.3 | 25  | 20.0 | 138 | 89.6  | 6  | 15.0 | 33 | 55.0 |
| Ever share works               |     |      |     |      |     |       |    |      |    |      |
| Yes                            | 145 | 38.3 | 89  | 71.2 | 10  | 6.5   | 30 | 75.0 | 16 | 26.7 |
| No, unknown, or not applicable | 234 | 61.7 | 36  | 28.8 | 144 | 93.5  | 10 | 25.0 | 44 | 73.3 |
| MSM*                           |     |      |     |      |     |       |    |      |    |      |
| Yes                            | 8   | 2.1  | 5   | 4.0  | 0   | 0.0   | 2  | 5.0  | 1  | 1.7  |
| No or unknown                  | 371 | 97.9 | 120 | 96.0 | 154 | 100.0 | 38 | 95.0 | 59 | 98.3 |
| Ever incarcerated              |     |      |     |      |     |       |    |      |    |      |
| Yes                            | 334 | 88.1 | 95  | 76.0 | 154 | 100.0 | 35 | 87.5 | 50 | 83.3 |
| No or unknown                  | 45  | 11.9 | 30  | 24.0 | 0   | 0.0   | 5  | 12.5 | 10 | 16.7 |

359 \*WEDSS: Wisconsin Electronic Disease Surveillance System; NH: Non-Hispanic; MSM: Men  
 360 who have sex with men.

361

362 **Table 2.** Characteristics of samples infected with mixed HCV genotypes

| Subject ID number | Major genotype (%) | Minor genotype (%) | Risk factor*                           |
|-------------------|--------------------|--------------------|----------------------------------------|
| 116               | 1a (96.75%)        | 2a (3.25%)         | Unknown                                |
| 63                | 1a (99.38%)        | 3a (0.62%)         | Ever injected drugs, ever shared works |
| 318               | 1a (96.18%)        | 3a (3.82%)         | Unknown                                |
| 338               | 1a (99.72%)        | 6f (0.28%)         | Ever injected drugs                    |
| 306               | 1a (98.57%)        | 2b (0.59%)         | Ever injected drugs, ever shared works |

363 \*When this evidence is available the individual can be classified as MSM, ever injected drugs, or  
 364 ever shared works.

365 **FIGURE LEGENDS**

366

367 **Figure 1. Maximum likelihood phylogenetic tree of HCV HVR1 consensus sequences.** 379

368 consensus sequences from Wisconsin are depicted with genotypes labelled.

369

370 **Figure 2. HCV transmission network of clusters identified by GHOST.** Each node represents

371 a HCV-infected individual for which HCV sequence data was generated. A transmission link is

372 denoted as a line connecting individuals where the minimal hamming distance between

373 sequences is smaller than the previously validated genetic threshold of 3.77%. Lines connecting

374 clusters are colored according to genotype with a blue, red and green line corresponding to

375 genotypes 1a, 3a and 2b cluster respectively.

376

377 **Figure 3. Intra-host genetic heterogeneity within transmission clusters.** K-step network

378 contains all possible minimum spanning trees and allows the efficient visualization of genetic

379 relatedness among all intra-host HVR1 variants for **(a)** Subjects 338 and 362 **(b)** Subjects 338

380 and 372 and **(c)** Subjects 362 and 372. Each node represents an HCV sequence and the color of

381 the node corresponds to the sample of origin: red if the variant was found in both samples, green

382 if it was only found in the first sample and blue if it was only found in the second sample. The

383 node size is based on frequency of the HVR1 variant and edge length is proportional to the

384 modified Hamming distance (does not count positions with insertions or deletions as

385 differences).

386

387 **Figure 4. Intra-host genetic variation of representative transmission clusters highlighting**  
388 **the genetic relatedness of distinct variants.** K-step network contains all possible minimum  
389 spanning trees and allows the efficient visualization of genetic relatedness among all intra-host  
390 HVR1 variants for **(a)** Subjects 84 and 86 **(b)** Subjecta 281 and 367. Each node represents an  
391 HCV sequence and the color of the node corresponds to the sample of origin: green if it was only  
392 found in the first sample and blue if it was only found in the second sample. The node size is  
393 based on frequency of the HVR1 variant and edge length is proportional to the modified  
394 Hamming distance (does not count positions with insertions or deletions as differences).  
395  
396

397 **Conflicts of Interest**

398 The authors have no conflicts of interest to disclose.

399 **Funding**

400 This work was supported by grants from the National Institute on Drug Abuse at the  
401 National Institutes of Health: UG3 DA044826 (Westergaard and Seal), U24 DA044801 (Allen),  
402 and R25 DA037190 (Hochstatter). Karli Hochstatter is also funded by a T32 DA037801 (NIDA).

403 **Prior Presentations**

404 The methods described in this paper, along with preliminary results from the first 231  
405 specimens analyzed, were presented in poster format at the 8<sup>th</sup> International Conference on  
406 Hepatitis Care in Substance Users in Montreal, Canada on September 11-13, 2019.

407 **Biographical Sketch**

408 Karli R Hochstatter, PhD, MPH is a Post-Doctoral Research Fellow at the Columbia  
409 University School of Social Work in New York and an Honorary Fellow at the University of  
410 Wisconsin School of Medicine and Public Health in Madison. Her research focuses on  
411 preventing HIV and HCV transmission and improving screening and treatment uptake among  
412 populations disproportionately burdened by substance use disorders, with a special focus on  
413 people who inject drugs and criminal justice-involved adults.

414 Damien C. Tully PhD is a Assistant Professor in Epidemiology, Biostatistics and  
415 Bioinformatics at the London School of Hygiene and Tropical Medicine. His primary research  
416 interests include the evolution and molecular epidemiology of RNA viruses.

417 **Corresponding author contact information**

418 Karli Hochstatter, PhD, MPH

419 University of Wisconsin School of Medicine and Public Health

420 1685 Highland Ave, Madison, WI 53705

421 [khochsta@medicine.wisc.edu](mailto:khochsta@medicine.wisc.edu)

422

423

424

425 **REFERENCES**

- 426 1. Hofmeister MG, Rosenthal EM, Barker LK, Rosenberg ES, Barranco MA, Hall EW, et al.  
427 Estimating Prevalence of Hepatitis C Virus Infection in the United States, 2013-2016.  
428 *Hepatology*. 2019 Mar;69(3):1020–31.
- 429 2. Ly KN, Hughes EM, Jiles RB, Holmberg SD. Rising Mortality Associated With Hepatitis C  
430 Virus in the United States, 2003–2013. *Clinical Infectious Diseases*. 2016 May  
431 15;62(10):1287–8.
- 432 3. Zibbell JE, Asher AK, Patel RC, Kupronis B, Iqbal K, Ward JW, et al. Increases in Acute  
433 Hepatitis C Virus Infection Related to a Growing Opioid Epidemic and Associated  
434 Injection Drug Use, United States, 2004 to 2014. *American Journal of Public Health*. 2018  
435 Feb;108(2):175–81.
- 436 4. Gardy JL, Johnston JC, Sui SJH, Cook VJ, Shah L, Brodtkin E, et al. Whole-Genome  
437 Sequencing and Social-Network Analysis of a Tuberculosis Outbreak. *New England*  
438 *Journal of Medicine*. 2011 Feb 24;364(8):730–9.
- 439 5. Little SJ, Kosakovsky Pond SL, Anderson CM, Young JA, Wertheim JO, Mehta SR, et al.  
440 Using HIV Networks to Inform Real Time Prevention Interventions. Harrigan PR, editor.  
441 *PLoS ONE*. 2014 Jun 5;9(6):e98443.
- 442 6. Poon AFY, Gustafson R, Daly P, Zerr L, Demlow SE, Wong J, et al. Near real-time  
443 monitoring of HIV transmission hotspots from routine HIV genotyping: an implementation  
444 case study. *The Lancet HIV*. 2016 May;3(5):e231–8.



- 445 7. Gardy JL, Loman NJ. Towards a genomics-informed, real-time, global pathogen  
446 surveillance system. *Nature Reviews Genetics*. 2017 Nov 13;19(1):9–20.
- 447 8. Fauci AS, Redfield RR, Sigounas G, Weahkee MD, Giroir BP. Ending the HIV Epidemic.  
448 *JAMA*. 2019 Mar 5;321(9):844.
- 449 9. Longmire AG, Sims S, Rytsareva I, Campo DS, Skums P, Dimitrova Z, et al. GHOST:  
450 global hepatitis outbreak and surveillance technology. *BMC Genomics*. 2017 Dec  
451 6;18(S10):916.
- 452 10. Vivolo-Kantor AM, Seth P, Gladden RM, Mattson CL, Baldwin GT, Kite-Powell A, et al.  
453 Vital Signs: Trends in Emergency Department Visits for Suspected Opioid Overdoses -  
454 United States, July 2016-September 2017. *MMWR Morbidity and mortality weekly report*.  
455 2018 Mar 9;67(9):279–85.
- 456 11. Wisconsin Department of Health Service, Wisconsin Epidemiological Profile on Alcohol  
457 and Other Drugs, 2016 (P-45718-16).
- 458 12. Centers for Disease Control and Prevention (CDC). Surveillance for Viral Hepatitis –  
459 United States, 2016. 2018.
- 460 13. Tully DC, Hjerrild S, Leutscher PD, Renvillard SG, Ogilvie CB, Bean DJ, et al. Deep  
461 sequencing of hepatitis C virus reveals genetic compartmentalization in cerebrospinal fluid  
462 from cognitively impaired patients. *Liver International*. 2016;36(10).

- 463 14. Campo DS, Xia G-L, Dimitrova Z, Lin Y, Forbi JC, Ganova-Raeva L, et al. Accurate  
464 Genetic Detection of Hepatitis C Virus Transmissions in Outbreak Settings. *Journal of*  
465 *Infectious Diseases*. 2016 Mar 15;213(6):957–65.
- 466 15. Tully DC, Ogilvie CB, Batorsky RE, Bean DJ, Power KA, Ghebremichael M, et al.  
467 Differences in the Selection Bottleneck between Modes of Sexual Transmission Influence  
468 the Genetic Composition of the HIV-1 Founder Virus. *PLoS Pathogens*. 2016;12(5).
- 469 16. Henn MR, Boutwell CL, Charlebois P, Lennon NJ, Power KA, Macalalad AR, et al. Whole  
470 genome deep sequencing of HIV-1 reveals the impact of early minor variants upon immune  
471 recognition during acute infection. *PLoS Pathogens*. 2012;8(3).
- 472 17. Hedegaard DL, Tully DC, Rowe IA, Reynolds GM, Bean DJ, Hu K, et al. High resolution  
473 sequencing of hepatitis C virus reveals limited intra-hepatic compartmentalization in end-  
474 stage liver disease. *Journal of Hepatology*. 2017;66(1).
- 475 18. Xu H, Luo X, Qian J, Pang X, Song J, Qian G, et al. FastUniq: a fast de novo duplicates  
476 removal tool for paired short reads. Doucet D, editor. *PloS one*. 2012 Dec 20;7(12):e52249.
- 477 19. Bolger AM, Lohse M, Usadel B. Trimmomatic: a flexible trimmer for Illumina sequence  
478 data. *Bioinformatics*. 2014 Aug 1;30(15):2114–20.
- 479 20. Yang X, Charlebois P, Gnerre S, Coole MG, Lennon NJ, Levin JZ, et al. De novo assembly  
480 of highly diverse viral populations. *BMC Genomics*. 2012 Sep 13;13(1):475.

- 481 21. Tamura K, Stecher G, Peterson D, Filipinski A, Kumar S. MEGA6: Molecular Evolutionary  
482 Genetics Analysis Version 6.0. *Molecular Biology and Evolution*. 2013 Dec;30(12):2725–  
483 9.
- 484 22. Nguyen L-T, Schmidt HA, von Haeseler A, Minh BQ. IQ-TREE: A Fast and Effective  
485 Stochastic Algorithm for Estimating Maximum-Likelihood Phylogenies. *Molecular Biology*  
486 *and Evolution*. 2015 Jan;32(1):268–74.
- 487 23. Hoang DT, Chernomor O, von Haeseler A, Minh BQ, Vinh LS. UFBoot2: Improving the  
488 Ultrafast Bootstrap Approximation. *Molecular Biology and Evolution*. 2018 Feb  
489 1;35(2):518–22.
- 490 24. Sims S, Longmire AG, Campo DS, Ramachandran S, Medrzycki M, Ganova-Raeva L, et al.  
491 Automated quality control for a molecular surveillance system. *BMC Bioinformatics*. 2018  
492 Oct 22;19(S11):358.
- 493 25. Jacka, Applegate T, Krajden M, Olmstead A, Harrigan PR, Marshall BDL, et al.  
494 Phylogenetic clustering of hepatitis C virus among people who inject drugs in Vancouver,  
495 Canada. *Hepatology*. 2014 Nov;60(5):1571–80.
- 496 26. Hackman J, Falade-Nwulia O, Patel EU, Mehta SH, Kirk GD, Astemborski J, et al.  
497 Correlates of hepatitis C viral clustering among people who inject drugs in Baltimore.  
498 *Infection, Genetics and Evolution*. 2020 May 16;77:104078.
- 499 27. Suryaprasad AG, White JZ, Xu F, Eichler B-A, Hamilton J, Patel A, et al. Emerging  
500 Epidemic of Hepatitis C Virus Infections Among Young Nonurban Persons Who Inject

- 501 Drugs in the United States, 2006–2012. *Clinical Infectious Diseases*. 2014 Nov  
502 15;59(10):1411–9.
- 503 28. Van Handel MM, Rose CE, Hallisey EJ, Kolling JL, Zibbell JE, Lewis B, et al. County-  
504 Level Vulnerability Assessment for Rapid Dissemination of HIV or HCV Infections among  
505 Persons Who Inject Drugs, United States. In: *Journal of Acquired Immune Deficiency*  
506 *Syndromes*. Lippincott Williams and Wilkins; 2016. p. 323–31.
- 507 29. Campo DS, Khudyakov Y. Intelligent Network DisRruption Analysis (INDRA): A targeted  
508 strategy for efficient interruption of hepatitis C transmissions. *Infection, Genetics and*  
509 *Evolution*. 2018 Sep;63:204–15.
- 510 30. Centers for Disease Control and Prevention. Hepatitis C Kills More Americans than Any  
511 Other Infectious Disease | CDC Online Newsroom | CDC [Internet]. 2016 [cited 2019 Sep  
512 24]. Available from: <https://www.cdc.gov/media/releases/2016/p0504-hepc-mortality.html>
- 513 31. Katzman C, Mateu-Gelabert P, Kapadia SN, Eckhardt BJ. Contact tracing for hepatitis C:  
514 The case for novel screening strategies as we strive for viral elimination. *The International*  
515 *journal on drug policy*. 2019 Oct;72:33–9.
- 516 32. Poon AFY, Gustafson R, Daly P, Zerr L, Demlow SE, Wong J, et al. Near real-time  
517 monitoring of HIV transmission hotspots from routine HIV genotyping: An implementation  
518 case study. *The Lancet HIV*. 2016 May 1;3(5):e231–8.
- 519 33. Mathematical modeling of hepatitis c virus (HCV) prevention among people who inject  
520 drugs: A review of the literature and insights for elimination strategies. - Abstract - Europe

- 521           PMC [Internet]. [cited 2020 Jun 13]. Available from:  
522           <https://europepmc.org/article/pmc/pmc6522340>
- 523   34.   Heffernan A, Cooke GS, Nayagam S, Thursz M, Hallett TB. Scaling up prevention and  
524           treatment towards the elimination of hepatitis C: a global mathematical model. *The Lancet*.  
525           2019 Mar 30;393(10178):1319–29.
- 526   35.   Cohen MS, McCauley M, Gamble TR. HIV treatment as prevention and HPTN 052. *Curr*  
527           *Opin HIV AIDS*. 2012 Mar;7(2):99–105.
- 528   36.   Cohen J. HIV Treatment as Prevention. *Science*. 2011 Dec 23;334(6063):1628–1628.
- 529   37.   Villabona-Arenas ChJ, Hanage WP, Tully DC. Phylogenetic interpretation during outbreaks  
530           requires caution. *Nature Microbiology*. 2020 May 19;1–2.
- 531

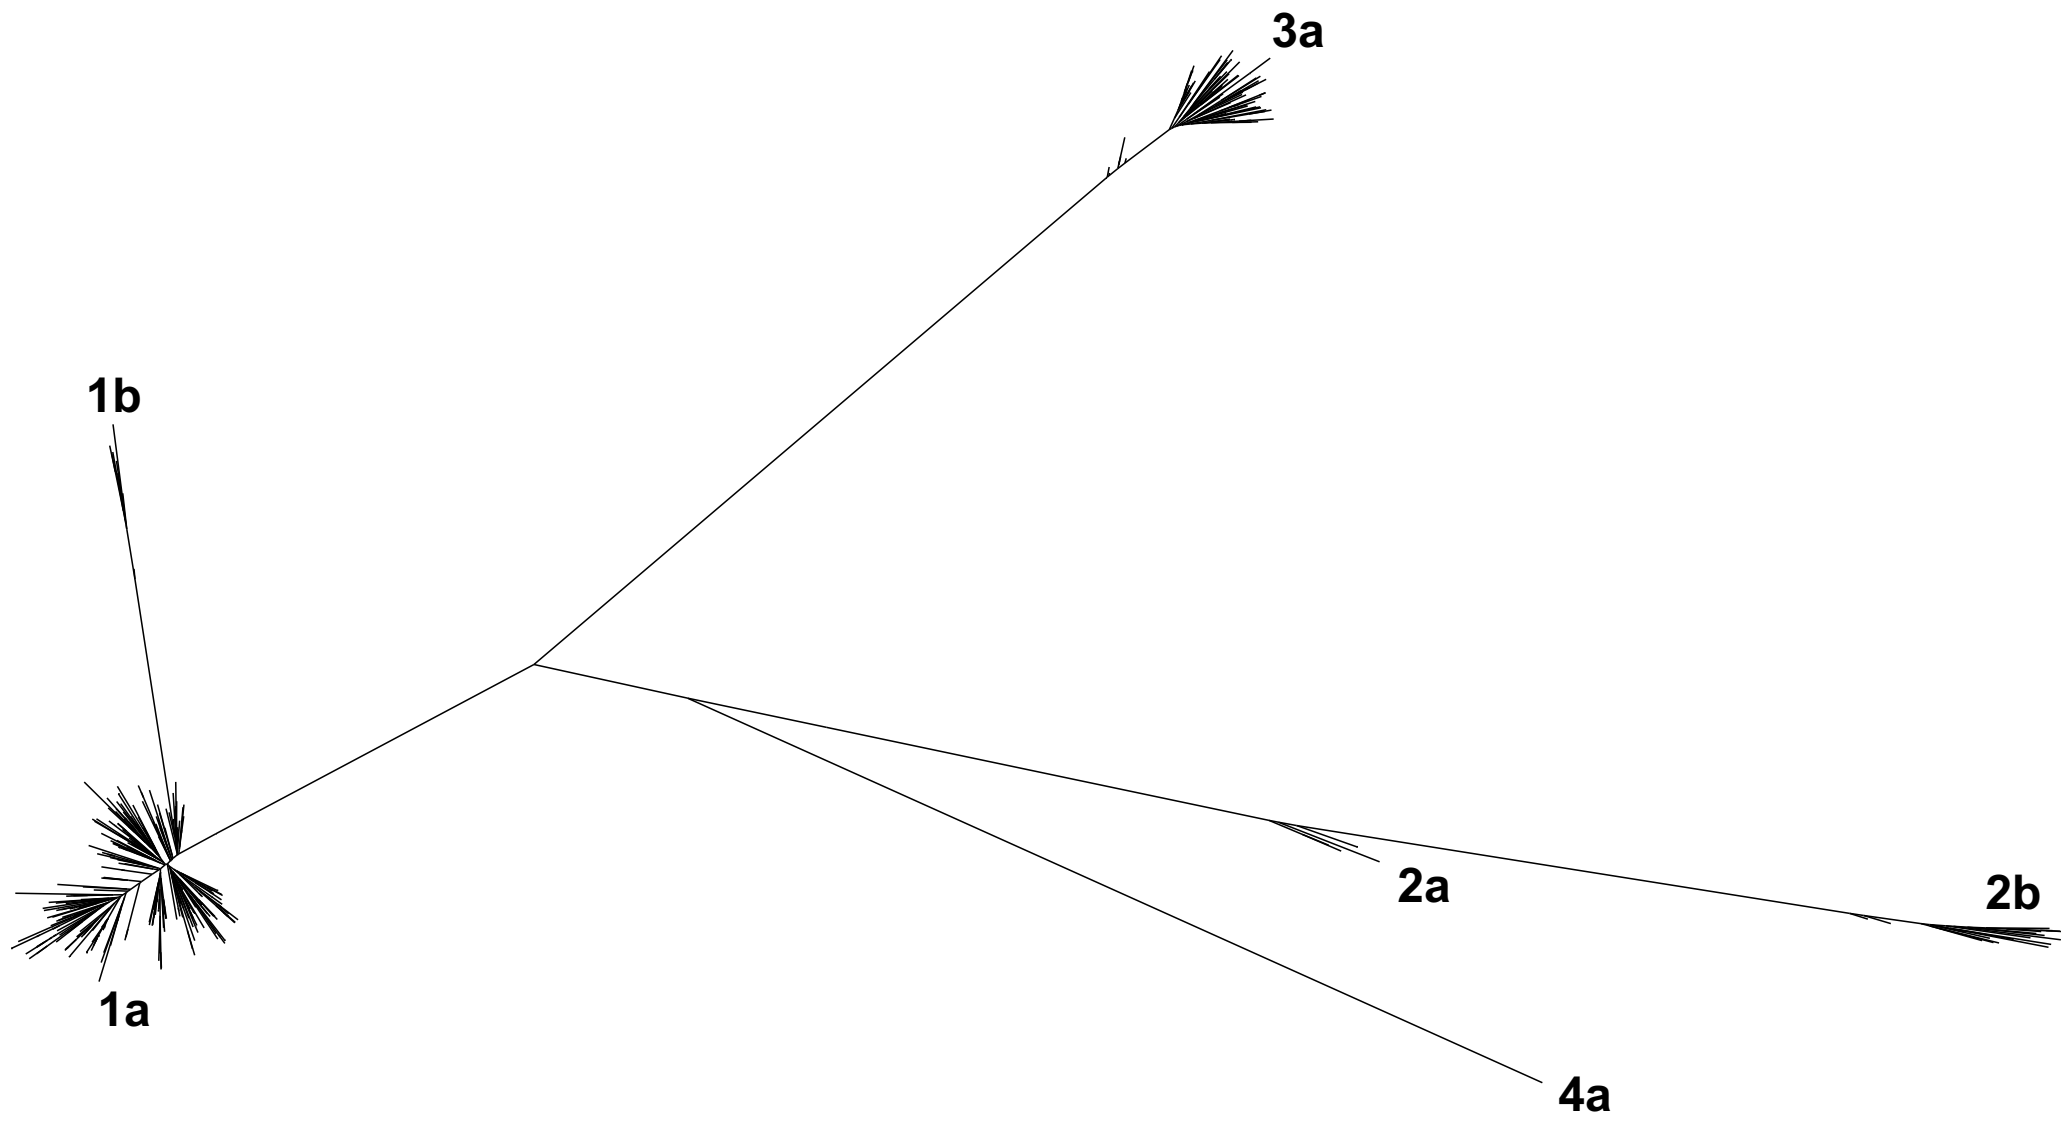

0.5

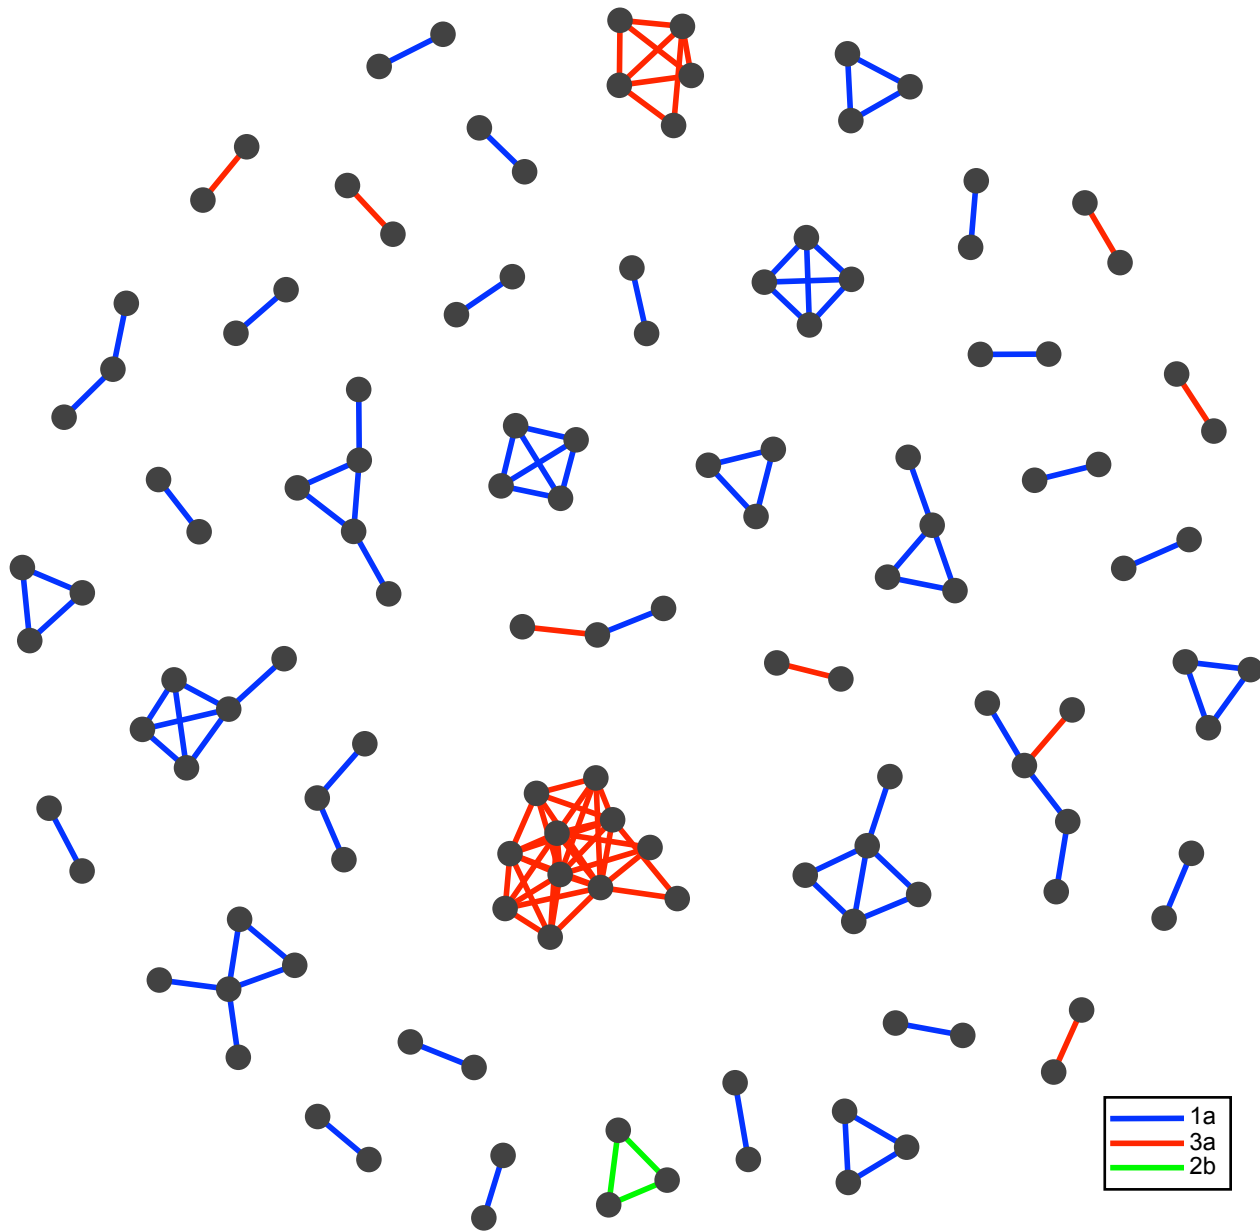

(a)

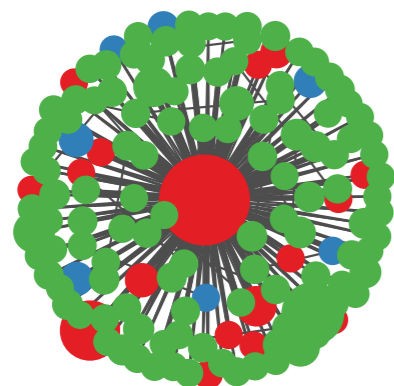

|                                          |     |
|------------------------------------------|-----|
| Min Frequency = 10, Max Frequency = 4888 |     |
| shared                                   | 19  |
| subject 338                              | 7   |
| subject 362                              | 115 |

(b)

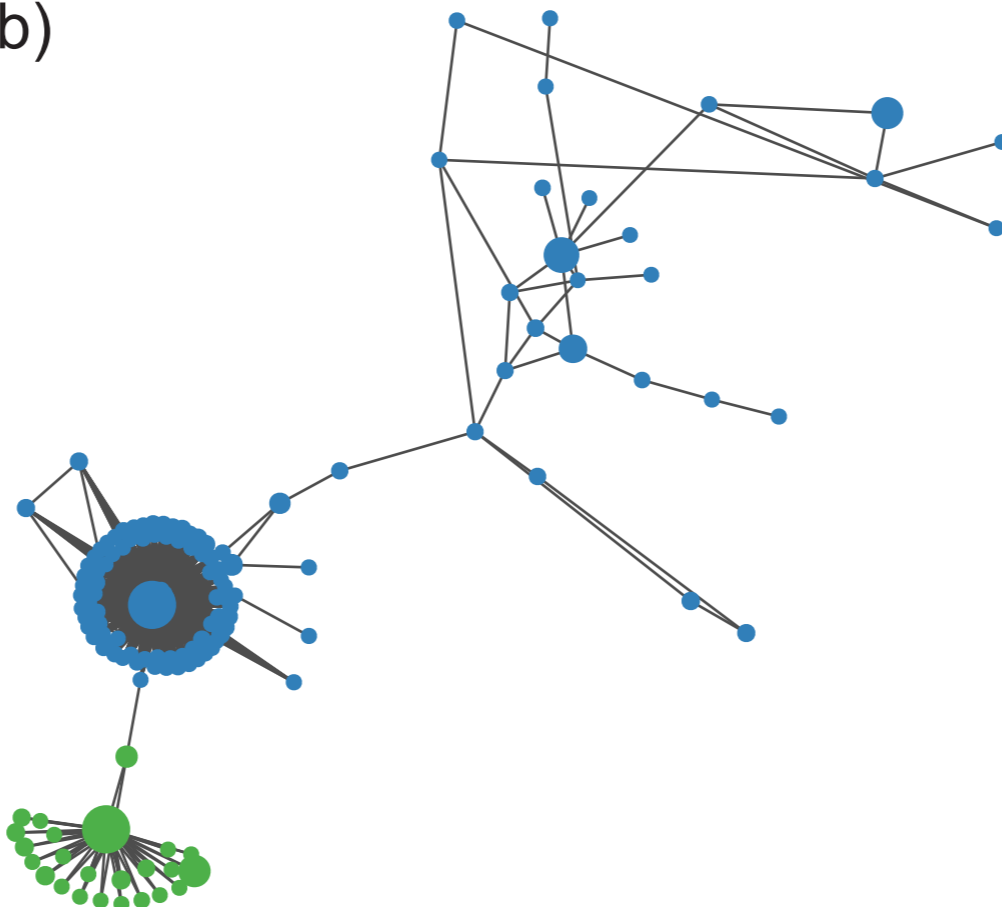

|                                          |     |
|------------------------------------------|-----|
| Min Frequency = 10, Max Frequency = 4888 |     |
| subject 338                              | 25  |
| subject 372                              | 122 |

(c)

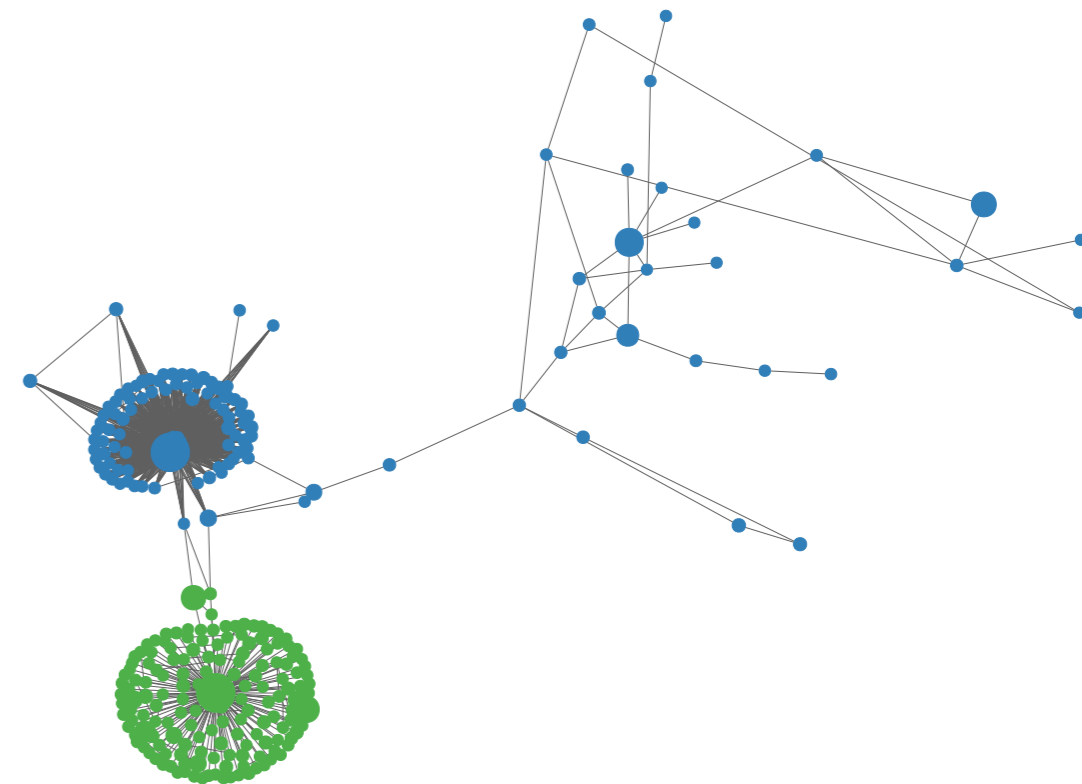

|                                           |     |
|-------------------------------------------|-----|
| Min Frequency = 10, Max Frequency = 11504 |     |
| subject 362                               | 156 |
| subject 372                               | 122 |



(a)

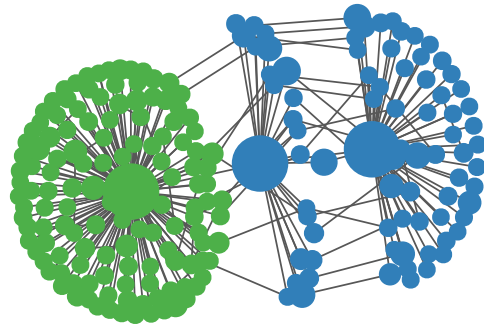

|                                           |     |
|-------------------------------------------|-----|
| Min Frequency = 10, Max Frequency = 12874 |     |
| subject 84                                | 79  |
| subject 86                                | 132 |

(b)

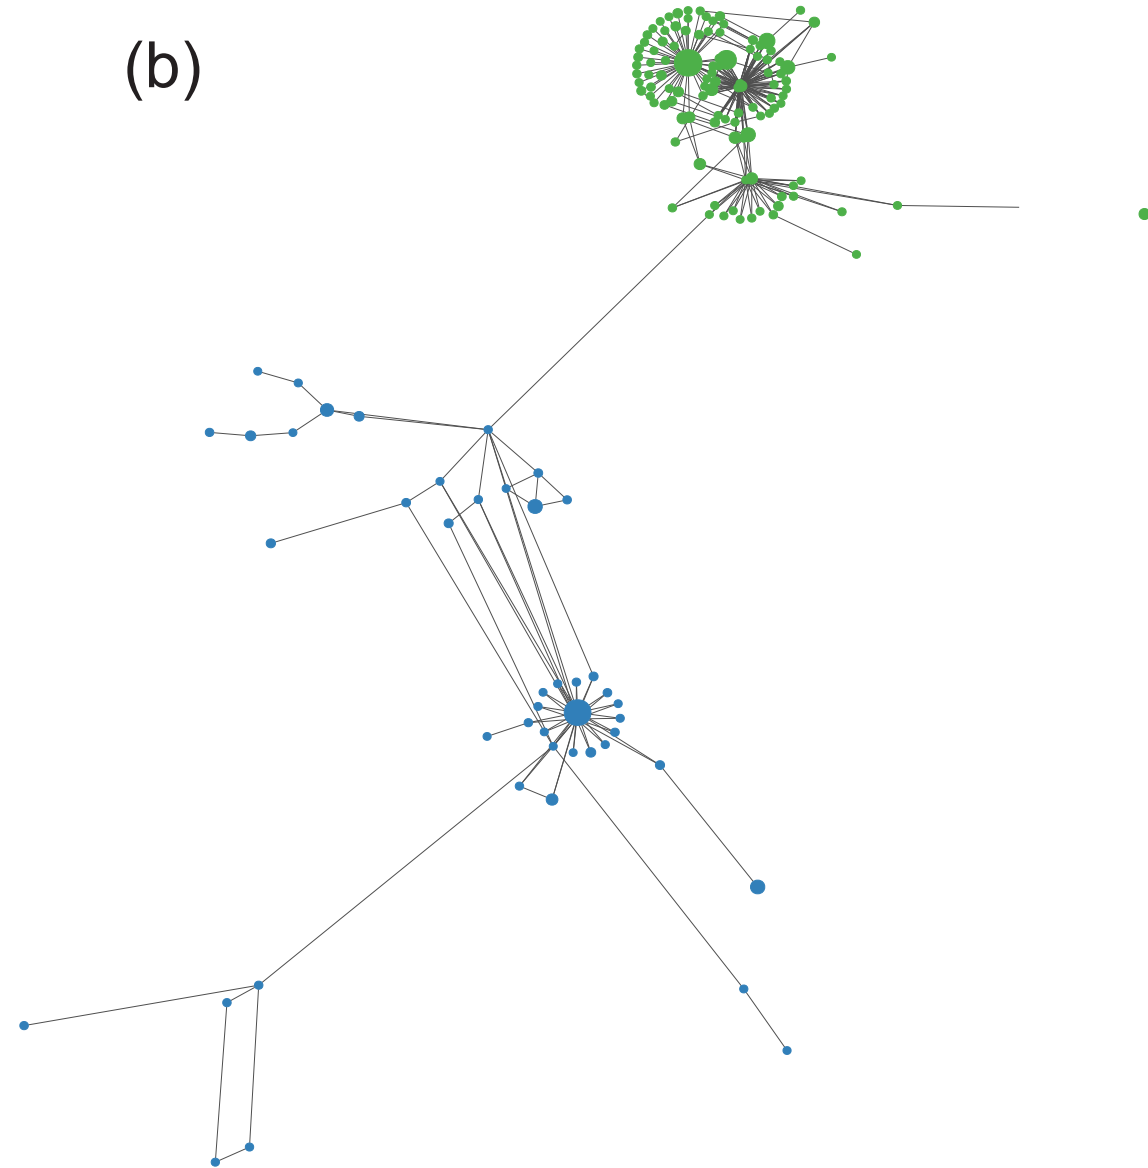

|                                          |     |
|------------------------------------------|-----|
| Min Frequency = 10, Max Frequency = 4430 |     |
| subject 281                              | 46  |
| subject 367                              | 109 |
